# Supplementary material
Source: ML conference proceedings conference paper supplement (https://openreview.net/forum?id=yKCLfOOIL7)
Supplement: supplementary_material [file attachment]

In[8]:= **\$Assumptions =  $\sigma > 0 \&\& c > 0 \&\& m > 4 \&\& nstar > 0 \&\& \alpha > 0$**

Out[8]=  $\sigma > 0 \&\& c > 0 \&\& m > 4 \&\& nstar > 0 \&\& \alpha > 0$

In[9]:= 
$$p[ni\_]:= \frac{\sigma^2}{\text{Sqrt}[2 \pi]} \int_{-\infty}^{\infty} \frac{\text{Exp}\left[-\frac{x^2}{2}\right]}{\frac{(m-2) nstar}{1+\alpha^2 \left(\frac{1}{ni} + \frac{1}{nstar}\right) x^2} + ni + nstar} dx + c ni$$

In[10]:= **Simplify[p'[nstar]]**

Out[10]= 
$$c + \frac{1}{32 m^2 nstar^2 \sqrt{2 \pi} \alpha^3} \sigma^2 \left( 2 m \sqrt{2 \pi} \alpha \left( (-2 + m) nstar - 4 m \alpha^2 \right) - \right. \\ \left. e^{\frac{m nstar}{8 \alpha^2}} \pi \left( m (m nstar)^{3/2} + 4 \times \left( 2 \sqrt{m nstar} - \sqrt{m^5 nstar} \right) \alpha^2 - 2 m \sqrt{m nstar} (nstar - 2 \alpha^2) \right) + \right. \\ \left. e^{\frac{m nstar}{8 \alpha^2}} \pi \left( m (m nstar)^{3/2} + 4 \times \left( 2 \sqrt{m nstar} - \sqrt{m^5 nstar} \right) \alpha^2 - 2 m \sqrt{m nstar} (nstar - 2 \alpha^2) \right) \right. \\ \left. \text{Erf}\left[\frac{\sqrt{m nstar}}{2 \sqrt{2} \alpha}\right] \right)$$

In[11]:= **Simplify[p[nstar]]**

Out[11]= 
$$\frac{1}{8} \times \left( 8 c nstar + \frac{4 \sigma^2}{nstar} - \frac{e^{\frac{m nstar}{8 \alpha^2}} (-2 + m) \sqrt{2 \pi} \sigma^2 \text{Erfc}\left[\frac{\sqrt{m nstar}}{2 \sqrt{2} \alpha}\right]}{\sqrt{m nstar} \alpha} \right)$$
